# Supplementary material for: Enhanced Electrochemical Behavior of Peanut-Shell Activated Carbon/Molybdenum Oxide/Molybdenum Carbide Ternary Composites
Source: MDPI journal article supplement (doi:10.3390/nano11041056), 2021-04-20
Supplement: s1 [file s1]

## Supplementary Materials

# Enhanced Electrochemical Behavior of Peanut-Shell Activated Carbon/Molybdenum Oxide/Molybdenum Carbide Ternary Composites

Ndeye F. Sylla <sup>1</sup>, Samba Sarr <sup>1</sup>, Ndeye M. Ndiaye <sup>2</sup>, Bridget K. Mutuma <sup>1</sup>, Astou Seck <sup>3</sup>, Balla D. Ngom <sup>2</sup>, Mohamed Chaker <sup>3</sup> and Ncholu Manyala <sup>1,\*</sup>

<sup>1</sup> Department of Physics, Institute of Applied Materials, SARChI Chair in Carbon Technology and Materials, University of Pretoria, Pretoria 0028, South Africa; ntoufasylla@gmail.com (N.F.S.); ssarr3112@gmail.com (S.S.); bridgetmutuma@gmail.com (B.K.M.)

<sup>2</sup> Laboratoire de Photonique Quantique, d'Energie et de Nano-Fabrication, Faculté des Sciences et Techniques, Université Cheikh Anta Diop de Dakar (UCAD), Dakar-Fann Dakar B.P. 5005, Sénégal; nmaty.ndiaye@gmail.com (N.M.N.); balla.ngom@ucad.edu.sn (B.D.N.)

<sup>3</sup> Institut National de la Recherche Scientifique Centre—Énergie Matériaux Télécommunications 1650, Boulevard Lionel Boulet, Varennes, QC J3X 1S2, Canada; astou.seck@emt.inrs.ca (A.S.); chaker@emt.inrs.ca (M.C.)

\* Correspondence: ncholu.manyala@up.ac.za; Tel.: +27-12-420-3549; Fax: +27-12-420-2516

**Table S1.** Composition (at.%) of the PAC/MoO<sub>2</sub>/Mo<sub>2</sub>C ternary composites.

| Peaks | Assignement        | Composition (at.%)                          |                                           |                                           |
|-------|--------------------|---------------------------------------------|-------------------------------------------|-------------------------------------------|
|       |                    | PAC/MoO <sub>2</sub> /Mo <sub>2</sub> C-0.5 | PAC/MoO <sub>2</sub> /Mo <sub>2</sub> C-1 | PAC/MoO <sub>2</sub> /Mo <sub>2</sub> C-2 |
| C 1s  | C=C; C-C           | 62.25                                       | 49.35                                     | 52                                        |
|       | C-OH; O-C=O        | 11.51                                       | 3.22                                      | 9.54                                      |
|       | C-Mo <sub>2</sub>  | 1.53                                        | 9.74                                      | 0.57                                      |
| Mo 3d | Mo <sup>4+</sup>   | 2.12                                        | 4.99                                      | 4.4                                       |
|       | Mo <sup>5+</sup>   | 0.96                                        | 6.74                                      | 4.59                                      |
|       | Mo <sup>6+</sup>   | 0.83                                        | 1.05                                      | 0.26                                      |
|       | Mo <sub>2</sub> -C | 1.89                                        | 2.23                                      | 0.43                                      |
| O 1s  | Mo-O               | 4.41                                        | 14.26                                     | 10.45                                     |
|       | O-C; O-C=O         | 15.86                                       | 8.42                                      | 17.77                                     |

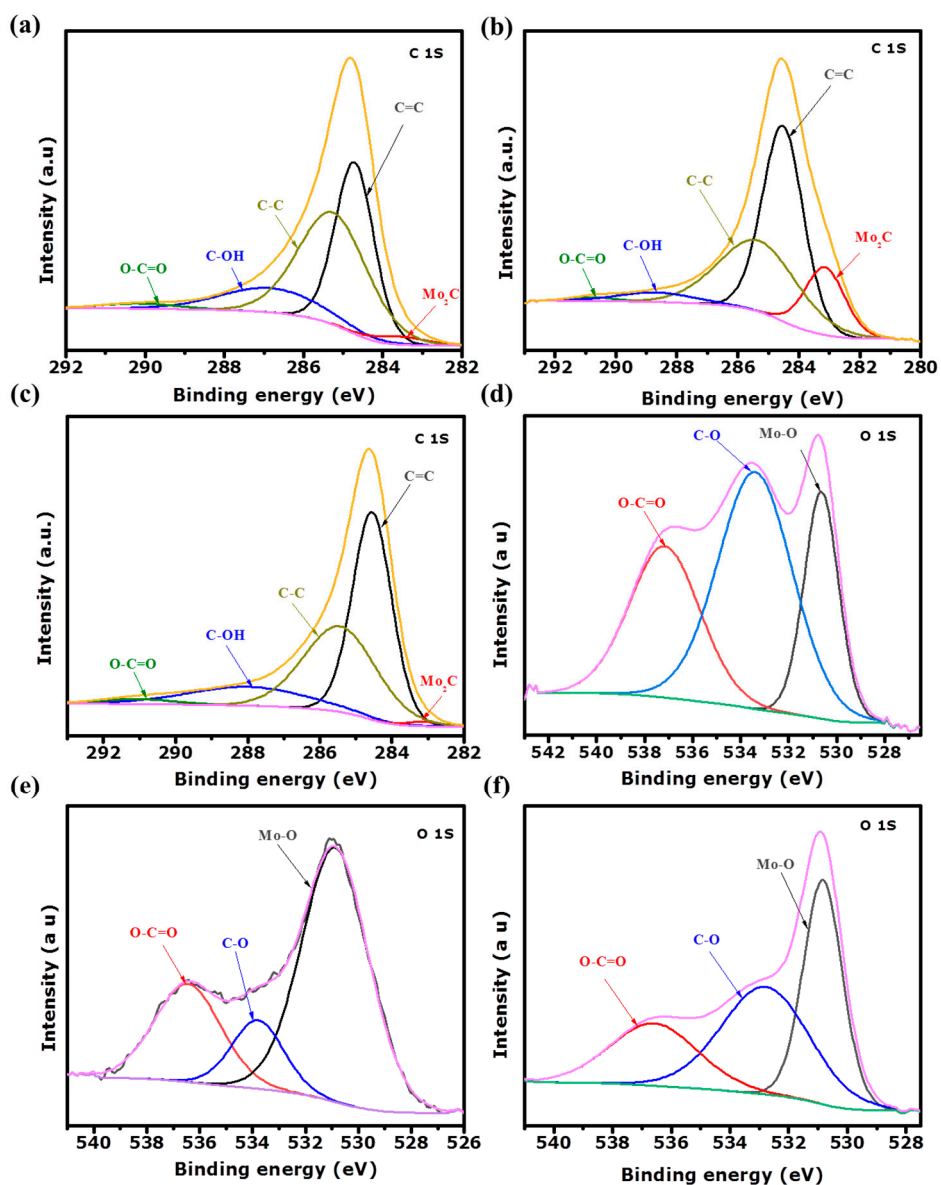

Figure S1. High resolution XPS spectra C 1s and O 1s of (a,d) PAC/MoO<sub>2</sub>/Mo<sub>2</sub>C-0.5 (b,e) PAC/MoO<sub>2</sub>/Mo<sub>2</sub>C-1 (c,f) PAC/MoO<sub>2</sub>/Mo<sub>2</sub>C-2 ternary composites.

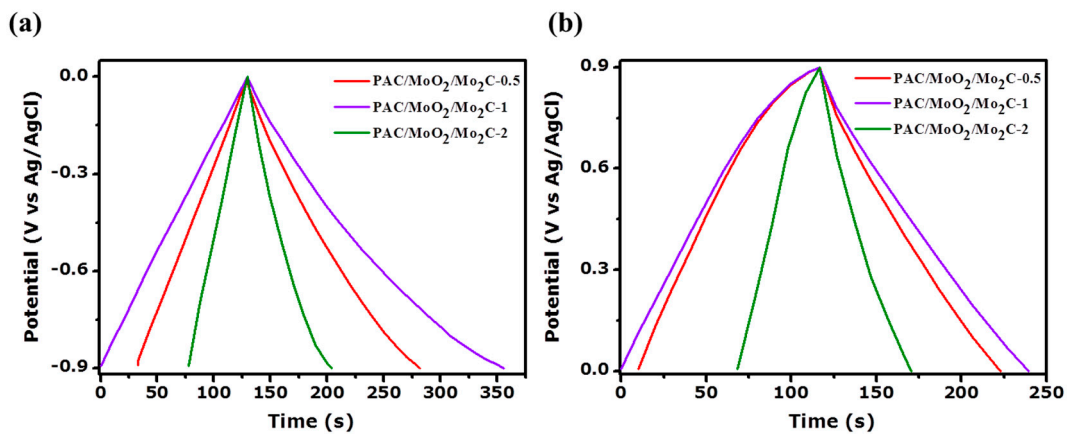

Figure S2. Galvanostatic charge-discharge curves at 1 A g<sup>-1</sup> (a) in -0.9–0.0 V negative and (b) 0.0–0.9 V positive potential windows of the PAC/MoO<sub>2</sub>/Mo<sub>2</sub>C ternary composites in three-electrode configuration.

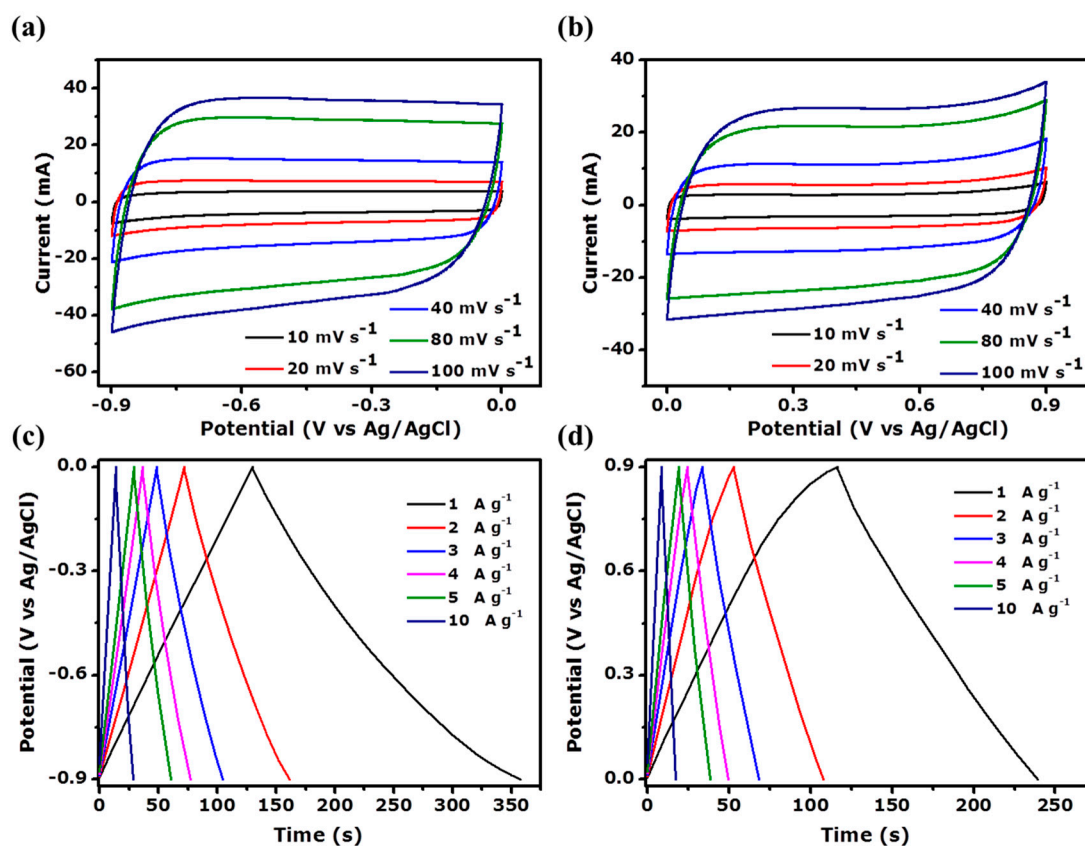

**Figure S3.** (a,b) CV plots at different scan rate from 10 to 100 mV s<sup>-1</sup> in (-0.9–0.0 V) and (0.0–0.9 V) operating potential, (c,d) GCD curves at different specific currents ranging from 1 to 10 A g<sup>-1</sup> in (-0.9–0.0 V) and (0.0–0.9 V) operating potential of the PAC/MoO<sub>2</sub>/Mo<sub>2</sub>C-1 ternary composite in three-electrode configuration.

**Table S2.** Comparison of electrochemical performance of Mo-based composite with carbon material in aqueous electrolyte.

| Materials                                 | Voltage (V) | Electrolyte                         | Specific current (A g <sup>-1</sup> ) | Specific energy (Wh kg <sup>-1</sup> ) | Specific power (W kg <sup>-1</sup> ) | Capacitance retention (%) / cycles | Ref.      |
|-------------------------------------------|-------------|-------------------------------------|---------------------------------------|----------------------------------------|--------------------------------------|------------------------------------|-----------|
| PAC/MoO <sub>2</sub> /Mo <sub>2</sub> C-1 | 0–1.8       | 2.5 M KNO <sub>3</sub>              | 1                                     | 51.8                                   | 900                                  | 83<br>25,000                       | This work |
| MoS <sub>2</sub> /MoO <sub>2</sub> @CNT   | 0–1.8       | 6 M KOH                             | 0.25                                  | 11.88                                  | 2000                                 | 102.2<br>10,000                    | [1]       |
| MoO <sub>2</sub> @C/CNT                   | 0–1.4       | 3 M KOH                             | 1                                     | 25.1                                   | 704.23                               | 87.1<br>2000                       | [2]       |
| MoP/MoO <sub>2</sub> /CNT                 | 0–1.5       | 6 M KOH                             | 0.25                                  | 31.6                                   | 190                                  | 86.5<br>10,000                     | [3]       |
| MoO <sub>2</sub> -G                       | -0.8–0.9    | 1 M Na <sub>2</sub> SO <sub>4</sub> | 1                                     | 22.6                                   | 5774                                 | 92.5<br>1000                       | [4]       |
| Mo <sub>2</sub> C@CNT                     | -0.4–0.6    | 1 M KOH                             | 1                                     | 50.9                                   | 500                                  | 97<br>5000                         | [5]       |
| Mo-based/CNs                              | 0–1.6       | 6 M KOH                             | 1                                     | 30.8                                   | 800                                  | 97.5<br>5000                       | [6]       |

## References

1. Tian, Y.; Du, H.; Zhang, M.; Zheng, Y.; Guo, Q.; Zhang, H.; Luo, J.; Zhang, X. Microwave synthesis of MoS<sub>2</sub>/MoO<sub>2</sub>@CNT nanocomposites with excellent cycling stability for supercapacitor electrodes. *J. Mater. Chem. C* **2019**, *7*, 9545–9555, doi:10.1039/c9tc02391g.
2. Si, H.; Sun, L.; Zhang, Y.; Wu, L.; Zhang, Y.; Zhang, Y. Enhanced pseudocapacitive energy storage properties of budding-branch like MoO<sub>2</sub>@C/CNT nanorods. *Dalt. Trans.* **2020**, *49*, 1637–1645, doi:10.1039/c9dt04391h.
3. Tian, Y.; Sarwar, S.; Zheng, Y.; Wang, S.; Guo, Q.; Luo, J.; Zhang, X. Ultrafast microwave manufacturing of MoP/MoO<sub>2</sub>/carbon nanotube arrays for high-performance supercapacitors. *J. Solid State Electrochem.* **2020**, *24*, 809–819, doi:10.1007/s10008-020-04524-2.
4. Thangappan, R.; Arivanandhan, M.; Kalaiselvam, S.; Jayavel, R.; Hayakawa, Y. Molybdenum Oxide/Graphene Nanocomposite Electrodes with Enhanced Capacitive Performance for Supercapacitor Applications. *J. Inorg. Organomet. Polym. Mater.* **2018**, *28*, 50–62, doi:10.1007/s10904-017-0699-1.
5. Hussain, S.; Rabani, I.; Vikraman, D.; Feroze, A.; Karuppasamy, K.; Haq, Z. ul; Seo, Y.-S.; Chun, S.-H.; Kim, H.-S.; Jung, J. Hybrid Design Using Carbon Nanotubes Decorated with Mo<sub>2</sub>C and W<sub>2</sub>C Nanoparticles for Supercapacitors and Hydrogen Evolution Reactions. *ACS Sustain. Chem. Eng.* **2020**, *8*, 12248–12259, doi:10.1021/acssuschemeng.0c04022.
6. Yang, W.; Deng, B.; Hou, L.; Wang, T.; Tian, J.; Wang, S.; Li, R.; Yang, F.; Li, Y. Sulfur-fixation strategy toward controllable synthesis of molybdenum-based/carbon nanosheets derived from petroleum asphalt. *Chem. Eng. J.* **2020**, *380*, 122552, doi:10.1016/j.cej.2019.122552.
